# Supplementary material for: Electron-donating strength dependent symmetry breaking charge transfer dynamics of quadrupolar molecules
Source: Royal Society of Chemistry journal article supplement (doi:10.1039/d0cp02527e), 2020-01-01
Supplement: d0cp02527e1.pdf [file d0cp02527e1.pdf]

## ***Electronic Supplementary Information***

### **Electron-Donating Strength Dependent Symmetry Breaking Charge Transfer Dynamics of Quadrupolar Molecules**

*Xinmiao Niu,<sup>a,b,†</sup> Zhuoran Kuang,<sup>a,b,†</sup> Miquel Planells,<sup>c</sup> Yuanyuan Guo,<sup>a,b</sup> Neil  
Robertson,<sup>\*c</sup> Andong Xia<sup>\*a,b</sup>*

<sup>a</sup> Beijing National Laboratory for Molecular Sciences (BNLMS), Key laboratory of  
Photochemistry, Institute of Chemistry, Chinese Academy of Sciences, Beijing  
100190, People's Republic of China

<sup>b</sup> University of Chinese Academy of Sciences, Beijing 100049, People's Republic of  
China

<sup>c</sup>EastChem – School of Chemistry, University of Edinburgh, Kings Buildings,  
Edinburgh EH9 3JJ, UK.

E-mail: [andong@iccas.ac.cn](mailto:andong@iccas.ac.cn) ; [neil.robertson@ed.ac.uk](mailto:neil.robertson@ed.ac.uk)

## **Table of Contents**

**S1. Details of the transient absorption spectral and transient fluorescence spectral measurements.**

**S2. Calculation of the emission dipole moment.**

**S3. Electronic-state transitions.**

**S4. Steady-state spectral data.**

**S5. Fluorescence lifetime measurements.**

**S6. Femtosecond transient absorption measurements.**

**S7. Nanosecond transient absorption measurements.**

## **S1. Details of the transient absorption spectral and transient fluorescence spectral measurements.**

### **Femtosecond transient absorption spectra.**

Transient absorption measurements with a time resolution of  $\sim 90$  fs were performed by using a homemade femtosecond broadband pump-probe setup.<sup>1, 2</sup> In brief, a pulse with 400 nm, 90 nJ produced by doubling a portion of the 800 nm pulse with a BBO (type I, 0.5 mm thickness) crystal from regenerative amplified femtosecond laser (50 fs, 1 kHz, Coherent Legend Elite U.S.A.) acts as the pump beam (spot size at the sample is ca. 130  $\mu\text{m}$ ). A white light super continuum (420-780 nm) generated by a water cell acts as probe beam with an optical delay up to  $>1$  ns. For isotropic measurements, the included angle between the pump and probe beam polarization was set to the magic angle ( $54.7^\circ$ ).

### **Femtosecond time-resolved transient fluorescence**

Femtosecond transient fluorescence spectra were conducted on a fluorescence up-conversion spectrophotometer.<sup>3</sup> The system was pumped by a regenerative amplified femtosecond Ti: sapphire laser (Legend Elite, Coherent) centered at 800 nm (1000 Hz,  $\sim 50$  fs,  $\sim 1.0$  mJ). The light beam was frequency-doubled in a BBO (type I) crystal and a dichroic mirror was used to separate the fundamental from the doubled beam (400 nm) sent for the fluorescence excitation. The remained fundamental light was time-delayed and used to gate the emission of the sample that flew in a 1-mm quartz cell. The collected fluorescence was focused onto a BBO crystal (type I, cut angle  $\Theta = 35$  degree) using reflective optics. The gating pulse was also focused onto the crystal overlapping with the fluorescence. The included angle between the excitation and gating beam polarization was set to the magic angle ( $54.7^\circ$ ). The up-converted signal was filtered and detected with a photomultiplier tube. The instrument response function of the system measured by gating the Raman signal from solvent was  $\sim 300$  fs.

## S2. Calculation of the emission dipole moment.

The steady-state emission dipole moment is calculated by equation S1 as follows,<sup>4</sup>

$$\mu_{em} = 1.7857 \times 10^3 \left[ \frac{k_r}{n^3 f(n) \tilde{\nu}_f^3} \right]^{1/2} \quad (S1)$$

where  $k_r$  is the radiative rate constant,  $n$  is the refractive index of solvent,  $f(n)$  is an effective cavity factor, is represented by equation S2,

$$f(n) = \frac{9n^2}{(2n^2 + 1)^2} \quad (S2)$$

and  $\tilde{\nu}_f^3$  is the cube of emission frequency,<sup>5</sup> defined by

$$\tilde{\nu}_f^3 = \frac{\int F(\nu) \nu^3 d\nu}{\int F(\nu) d\nu} \quad (S3)$$

, where  $\nu$  is the wavenumber and  $F(\nu)$  denotes the fluorescence spectrum after the correction of the instrument spectral response.

The obtained steady-state emission dipole moment is denoted as  $\mu_{em}(S)$ . Using this quantify, the time-dependent instantaneous emission dipole moment is obtained by equation S4,

$$\mu_{em}(t) = \mu_{em}(S) \cdot \sqrt{\int_{\nu_1}^{\nu_2} F_{\tau}(t) / \int_{\nu_1}^{\nu_2} F_{\tau}(t) dt (> 200 ps)} \quad (S4)$$

, where  $F_{\tau}(t)$  is the corrected fluorescence intensity for population decay using equation S5,

$$F_{\tau}(t) = \frac{F(t)}{\exp(-t/\tau)} \quad (S5)$$

Since this dynamic process include solvation, structural relaxation, 200 ps is an adequate time to use  $F_{\tau}(t > 200 ps)$  as a normalization factor.

### S3. Electronic-state transitions.

**Table S1.** Electronic transition properties of **Me-DATPA** and **MeO-DATPA** in gas phase at their optimized ground state geometries at the TD-DFT/CAM-B3LYP/6-31G(d) level.

|                           | Me-DATPA          | MeO-DATPA         |
|---------------------------|-------------------|-------------------|
|                           | S <sub>1</sub>    | S <sub>1</sub>    |
| <i>E</i> (eV)             | 3.50 eV (354 nm)  | 3.51eV (353 nm)   |
| oscillator strength       | 2.1646            | 2.2836            |
| main orbital contribution | HOMO→LUMO 0.639   | HOMO→LUMO 0.636   |
|                           | HOMO-2→LUMO 0.144 | HOMO-2→LUMO 0.161 |

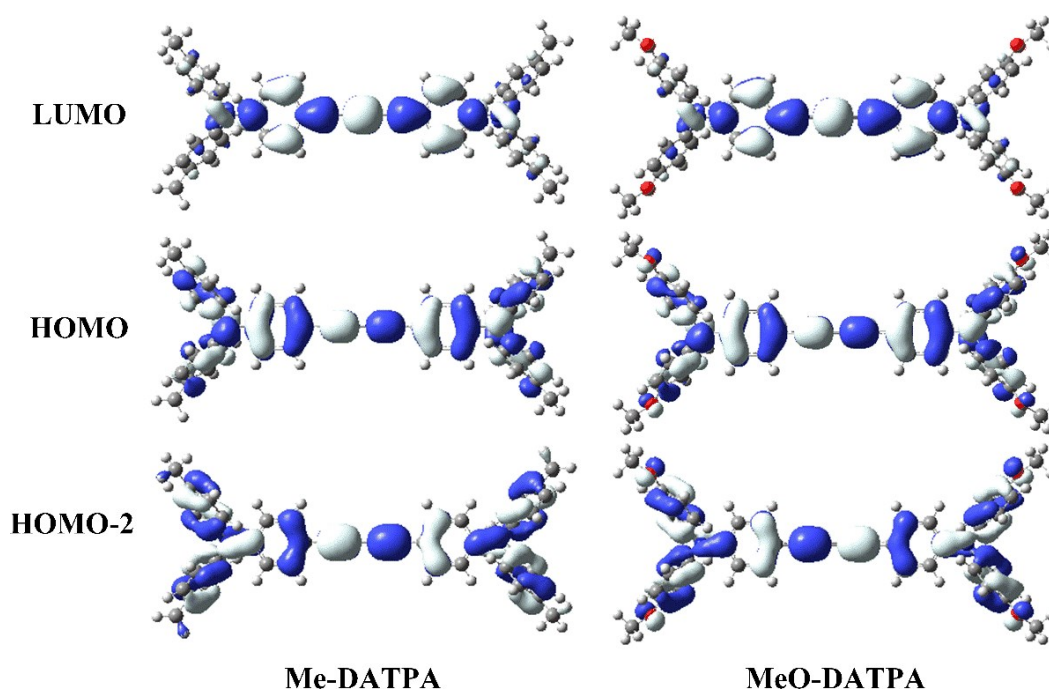

**Figure S1.** Electron density contours of molecular orbitals LUMO, HOMO, HOMO-2 at S<sub>0</sub> geometries of **Me-DATPA** and **MeO-DATPA** in the gas phase.

## S4. Steady-state spectral data.

**Table S2.** Absorption, fluorescence and solvents parameters.

| solvent          | Abbr. | $\Delta f^a$ | Me-DATPA                                  |                         |                                       | $\Delta f$ | MeO-DATPA                                 |                         |                                       |
|------------------|-------|--------------|-------------------------------------------|-------------------------|---------------------------------------|------------|-------------------------------------------|-------------------------|---------------------------------------|
|                  |       |              | $\lambda_{\square\square\square}$<br>(nm) | $\lambda_{flu}$<br>(nm) | Stokes Shifts<br>( $\text{cm}^{-1}$ ) |            | $\lambda_{\square\square\square}$<br>(nm) | $\lambda_{flu}$<br>(nm) | Stokes Shifts<br>( $\text{cm}^{-1}$ ) |
| Cyclohexane      | CHX   | 0            | 376                                       | 418                     | 2672                                  | 0          | 379                                       | 428.4                   | 3043                                  |
| Di-n-butyl Ether | DBE   | 0.095        | 376                                       | 423.4                   | 2977                                  | 0.095      | 378                                       | 438.6                   | 3655                                  |
| Diethyl ether    | DEE   | 0.163        | 377                                       | 426                     | 3051                                  | 0.163      | 379                                       | 445.8                   | 3954                                  |
| Butyl acetate    | BA    | 0.17         | 377                                       | 432.2                   | 3388                                  | 0.17       | 378                                       | 456                     | 4525                                  |
| Ethyl acetate    | EA    | 0.2          | 378                                       | 435.6                   | 3498                                  | 0.2        | 382                                       | 463.8                   | 4617                                  |
| Tetrahydrofuran  | THF   | 0.21         | 379                                       | 438.6                   | 3585                                  | 0.21       | 386                                       | 466                     | 4448                                  |
| Acetone          | ACE   | 0.285        | 375                                       | 455.8                   | 4727                                  | 0.285      | 377                                       | 502.6                   | 6629                                  |

<sup>a</sup> The polarity indices are taken from Ref 6.<sup>6</sup>

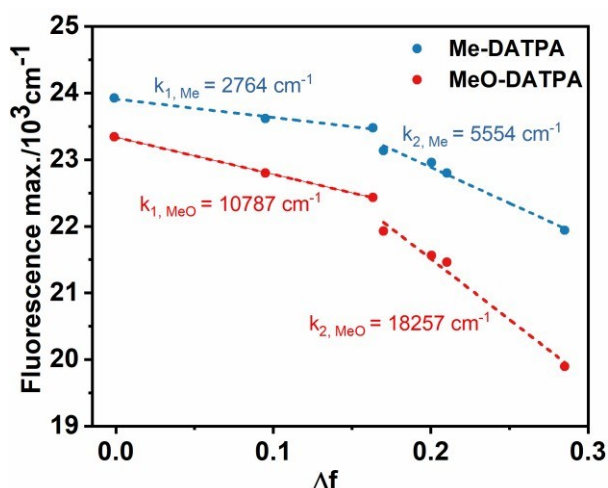

**Figure S2.** Fluorescence maximum of both molecules as a function of the solvent orientation polarizability and best linear fits.

**Table S3.** Slopes of the linear fit of the fluorescence maximum of **Me-DATPA** and

**MeO-DATPA** against with solvent polarizability  $\Delta f = \frac{(\square-1)}{(2\square+1)} - \frac{(\square^2-1)}{(2\square^2+1)}$ .  $k_1$

corresponds to the initial slope from the nonpolar to medium polar solvents, while  $k_2$  represents the slope from medium polar to highly polar solvents. (Figure S1)

|                  | $k_1$ ( $\text{cm}^{-1}$ ) | $k_2$ ( $\text{cm}^{-1}$ ) |
|------------------|----------------------------|----------------------------|
| <b>Me-DATPA</b>  | 2764                       | 5554                       |
| <b>MeO-DATPA</b> | 10787                      | 18257                      |

**Table S4.** Photophysical properties of **Me-DATPA** and **MeO-DATPA**.

| solvent          | Me-DATPA |             |                                     |                                        | MeO-DATPA |             |                                     |                                        |
|------------------|----------|-------------|-------------------------------------|----------------------------------------|-----------|-------------|-------------------------------------|----------------------------------------|
|                  | $\Phi_f$ | $\tau$ (ns) | $k_r^b(\times 10^8 \text{ s}^{-1})$ | $k_{nr}^b(\times 10^8 \text{ s}^{-1})$ | $\Phi_f$  | $\tau$ (ns) | $k_r^b(\times 10^8 \text{ s}^{-1})$ | $k_{nr}^b(\times 10^8 \text{ s}^{-1})$ |
| Cyclohexane      | 0.73     | 0.68        | 10.74                               | 3.97                                   | 0.77      | 0.83        | 9.28                                | 2.77                                   |
| Di-n-butyl Ether | 0.58     | 0.77        | 7.53                                | 5.45                                   | 0.59      | 1.02        | 5.78                                | 4.02                                   |
| Diethyl ether    | 0.58     | 0.83        | 6.99                                | 5.06                                   | 0.51      | 1.27        | 4.02                                | 3.86                                   |
| Butyl acetate    | 0.57     | 0.85        | 6.71                                | 5.06                                   | 0.50      | 1.43        | 3.50                                | 3.50                                   |
| Ethyl acetate    | 0.49     | 0.89        | 5.51                                | 5.73                                   | 0.42      | 1.66        | 2.53                                | 3.49                                   |
| Tetrahydrofuran  | 0.41     | 0.9         | 4.56                                | 6.56                                   | 0.30      | 1.67        | 1.80                                | 4.19                                   |
| Acetone          | 0.32     | 1.27        | 2.52                                | 5.35                                   | 0.21      | 2.16        | 0.97                                | 3.66                                   |

<sup>b</sup> Rate constants of radiative  $k_r$  and nonradiative  $k_{nr}$  are calculated using equations  $\Phi_f = k_r / (k_r + k_{nr})$  and  $\tau = 1 / (k_r + k_{nr})$ .

## S5. Fluorescence lifetime measurements.

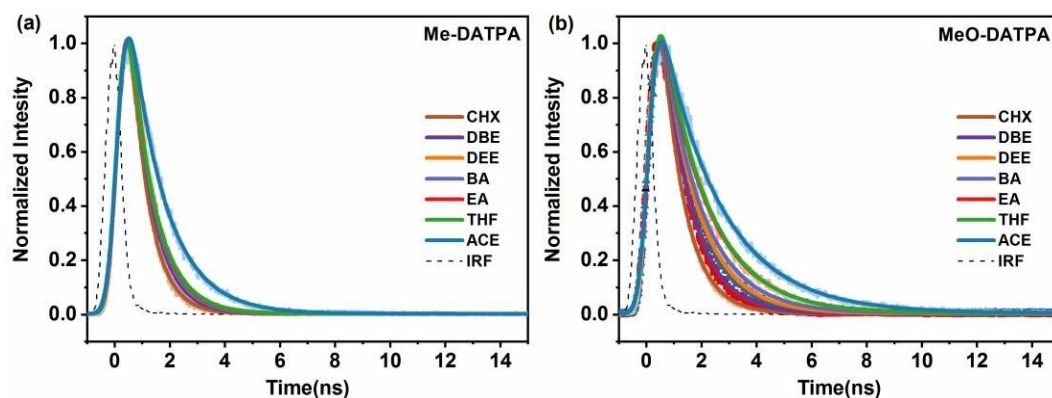**Figure S3.** Fluorescence lifetimes of (a) dye **1** and (b) dye **2**. Fitting results are also included.

## S6. Femtosecond transient absorption experiments.

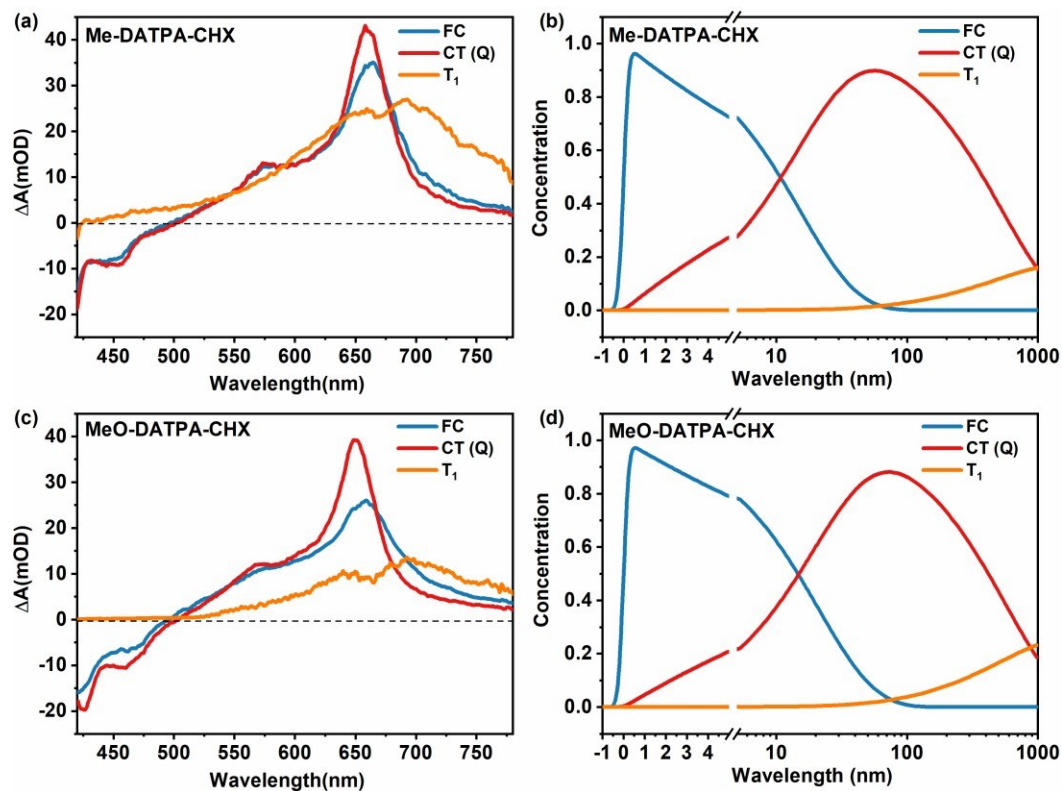

**Figure S4.** SADs from target analysis and concentration evolution of transient species of **Me-DATPA** and **MeO-DATPA** in CHX.



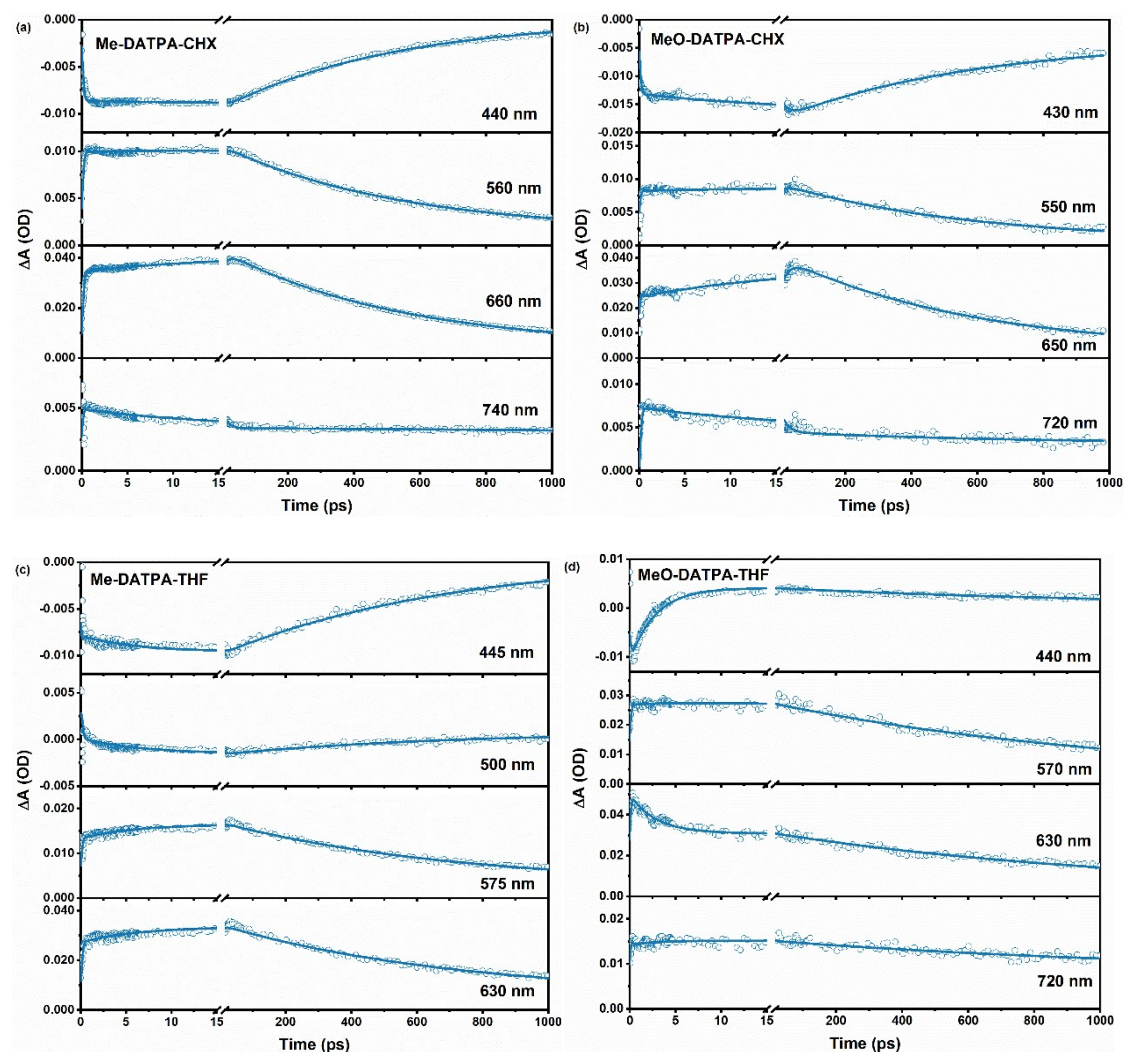

**Figure S5.** Kinetics of femtosecond transient absorption spectra of **Me-DATPA** and **MeO-DATPA** in CHX and THF at selected wavelengths are plotted (dot) together with global fitting curves (line) of all collected time traces. For **Me-DATPA** in CHX, 440, 560, 660 and 740 nm wavelengths are selected (a), and for **MeO-DATPA** in CHX, 430, 550, 650 and 720 nm wavelengths are selected (b). For **Me-DATPA** in THF, 445, 500, 575 and 630 nm wavelengths are selected (c), and for **MeO-DATPA** in THF, 440, 570, 630 and 720 nm wavelengths are selected (d).

## S7. Nanosecond transient absorption experiments.

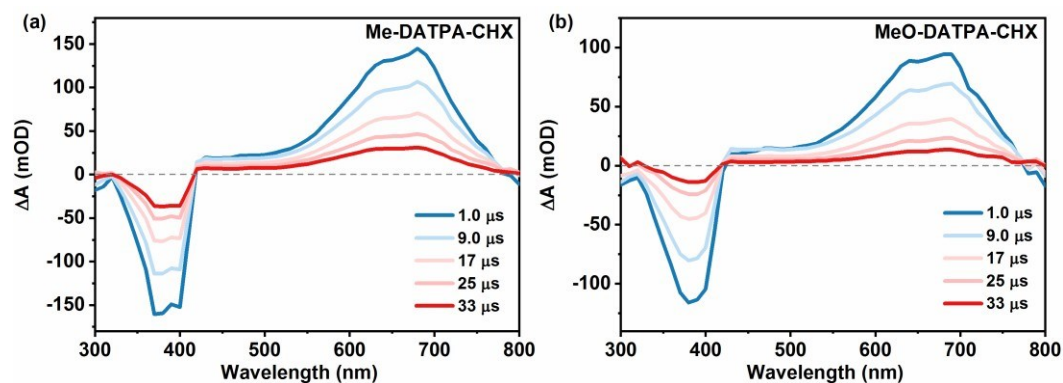

**Figure S6.** Nanosecond transient absorption spectra of **Me-DATPA** (a) and **MeO-DATPA** (b) in CHX.

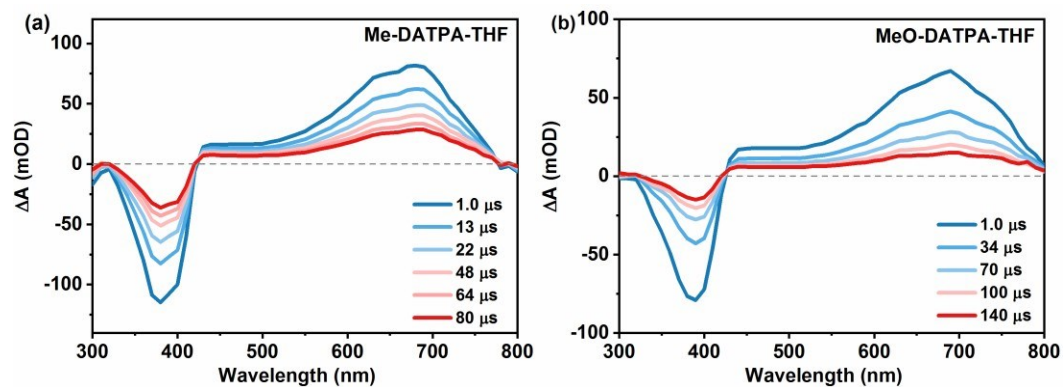

**Figure S7.** Nanosecond transient absorption spectra of **Me-DATPA** (a) and **MeO-DATPA** (b) in THF.

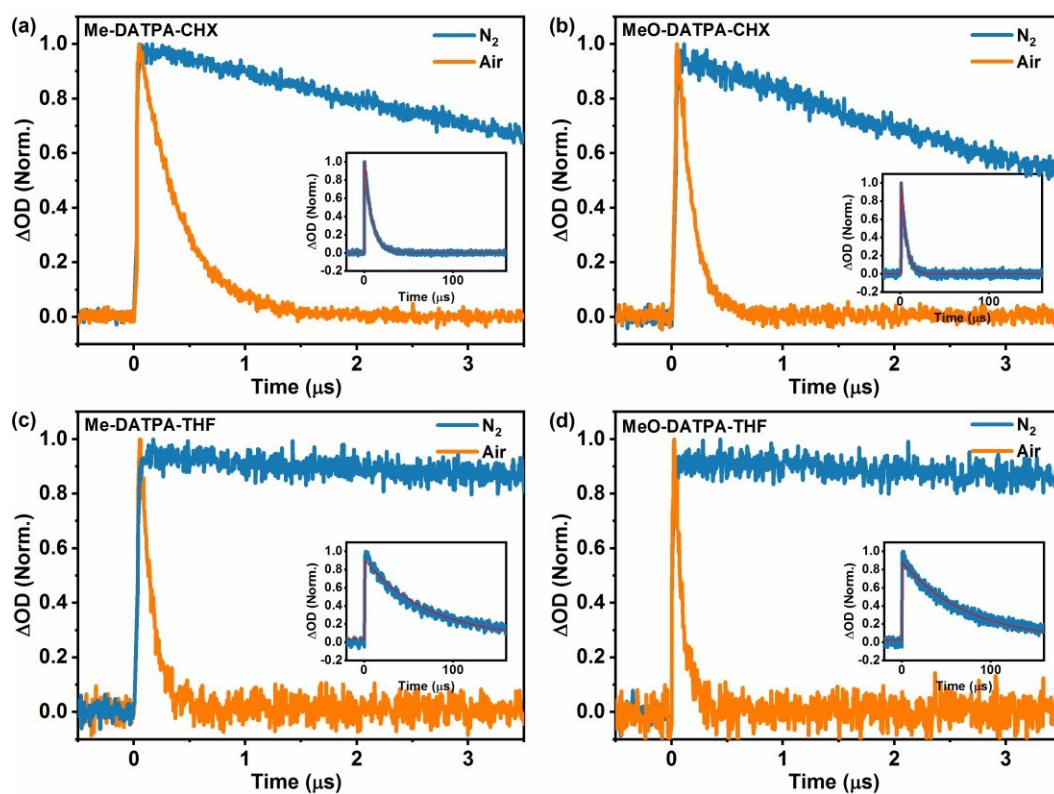

**Figure S8** The kinetic traces of **Me-DATPA** and **MeO-DATPA** in CHX and THF solutions under different gas conditions ( $N_2$ , air). The lifetime of two molecules in  $N_2$ -saturated solvents is increased compared with in air-saturated solvents, indicating the long-live state is a triplet state.

## References

1. Z. Kuang, G. He, H. Song, X. Wang, Z. Hu, H. Sun, Y. Wan, Q. Guo and A. Xia, *J. Phys. Chem. C*, 2018, **122**, 3727-3737.
2. M. Zhou, S. Vdovic, S. Long, M. Zhu, L. Yan, Y. Wang, Y. Niu, X. Wang, Q. Guo, R. Jin and A. Xia, *J. Phys. Chem. A*, 2013, **117**, 10294-10303.
3. Z. Kuang, H. Song, Y. Guo, Q. Guo and A. Xia, *Chin. J. Chem. Phys.*, 2019, **32**, 59-66.
4. J. S. Beckwith, A. Rosspeintner, G. Licari, M. Lunzer, B. Holzer, J. Froehlich and E. Vauthey, *J. Phys. Chem. Lett.*, 2017, **8**, 5878-5883.
5. G. Angulo, G. Grampp and A. Rosspeintner, *Spectrochimica Acta Part a-Molecular and Biomolecular Spectroscopy*, 2006, **65**, 727-731.
6. M. L. Horng, J. A. Gardecki, A. Papazyan and M. Maroncelli, *J. Phys. Chem.*, 1995, **99**, 17311- 17337.
